# Supplementary material for: Inhibition of Acetylcholinesterase and Amyloid-β Aggregation by Piceatannol and Analogs: Assessing In Vitro and In Vivo Impact on a Murine Model of Scopolamine-Induced Memory Impairment
Source: MDPI journal article supplement (doi:10.3390/antiox12071362), 2023-06-29
Supplement: s1 [file s1]

**Inhibition of Acetylcholinesterase and Amyloid- $\beta$  Aggregation by  
Piceatannol and Analogs: Assessing In Vitro and In Vivo Impact on a  
Murine Model of Scopolamine-Induced Memory Impairment**

**Yi-Yan Sie<sup>1,†</sup>, Liang-Chieh Chen<sup>2,3,†</sup>, Cai-Jhen Li<sup>4</sup>, Yu-Hsiang Yuan<sup>4</sup>, Sheng-Hung Hsiao<sup>4</sup>,  
Mei-Hsien Lee<sup>4</sup>, Ching-Chiung Wang<sup>5,6,\*</sup> and Wen-Chi Hou<sup>4,\*</sup>**

<sup>1</sup> Ph.D. Program in Clinical Drug Development of Herbal Medicine, College of Pharmacy, Taipei Medical University, Taipei, Taiwan

<sup>2</sup> Department of Pharmacology and Pharmaceutical Sciences, School of Pharmacy, University of Southern California, Los Angeles, CA, United States

<sup>3</sup> Graduate Institute of Cancer Biology and Drug Discovery, College of Medical Science and Technology, Taipei Medical University, Taipei, Taiwan

<sup>4</sup> Graduate Institute of Pharmacognosy, Taipei Medical University, Taipei 110, Taiwan

<sup>5</sup> School of Pharmacy, Taipei Medical University, Taipei 110, Taiwan

<sup>6</sup> Traditional Herbal Medicine Research Center, Taipei Medical University Hospital, Taipei, Taiwan

\* Correspondence: crystal@tmu.edu.tw (C.-C.W.); wchou@tmu.edu.tw (W.-C.H.)

† These two authors have contributed equally to this work.

## Supplementary materials

**Table S1.** CDOCKER interaction energy for piceatannol, gnetol, resveratrol, rhapontigenin, and isorhapontigenin docked in AChE and A $\beta$  peptide (1-42)

| Compound         | AChE                                        | A $\beta$ peptide (1-42)                    |
|------------------|---------------------------------------------|---------------------------------------------|
|                  | CDOCKER<br>Interaction Energy<br>(kcal/mol) | CDOCKER<br>Interaction Energy<br>(kcal/mol) |
| Piceatannol      | -36.3392                                    | -19.3083                                    |
| Gnetol           | -34.6363                                    | -13.7451                                    |
| Resveratrol      | -31.4709                                    | -17.0259                                    |
| Rhapontigenin    | -34.5302                                    | -14.7856                                    |
| Isorhapontigenin | -35.1776                                    | -14.2737                                    |

**Figure S1**

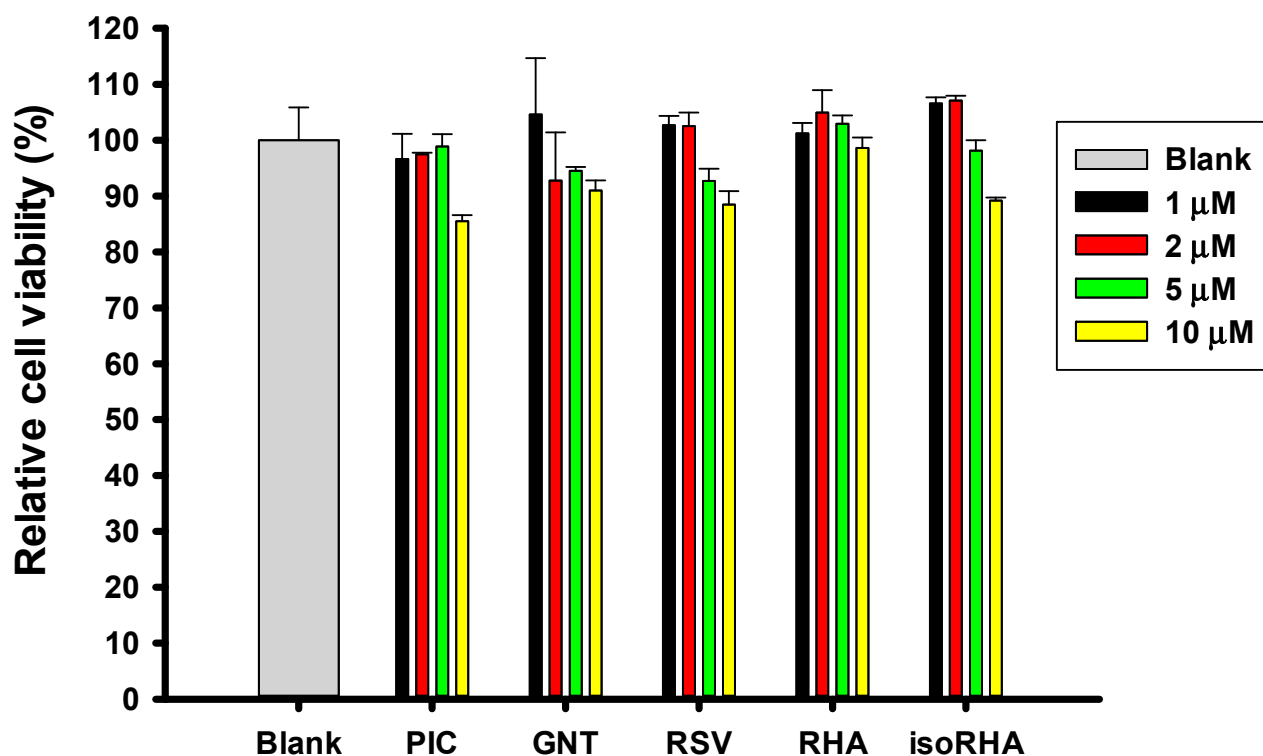

**Figure S1.** Effects of different concentrations (1, 2, 5, and 10  $\mu\text{M}$ ) of hydroxylated stilbenes (PIC, GNT, RSV, RHA, and isoRHA) on cytotoxicities of SH-SY5Y cells. The MTT was used to evaluate cell viability, and the absorbance at 570nm was determined. The DMSO used instead of sample solution was the blank (recognized as 100%), and each treatment was expressed as relative cell viability (%).

**Figure S2**

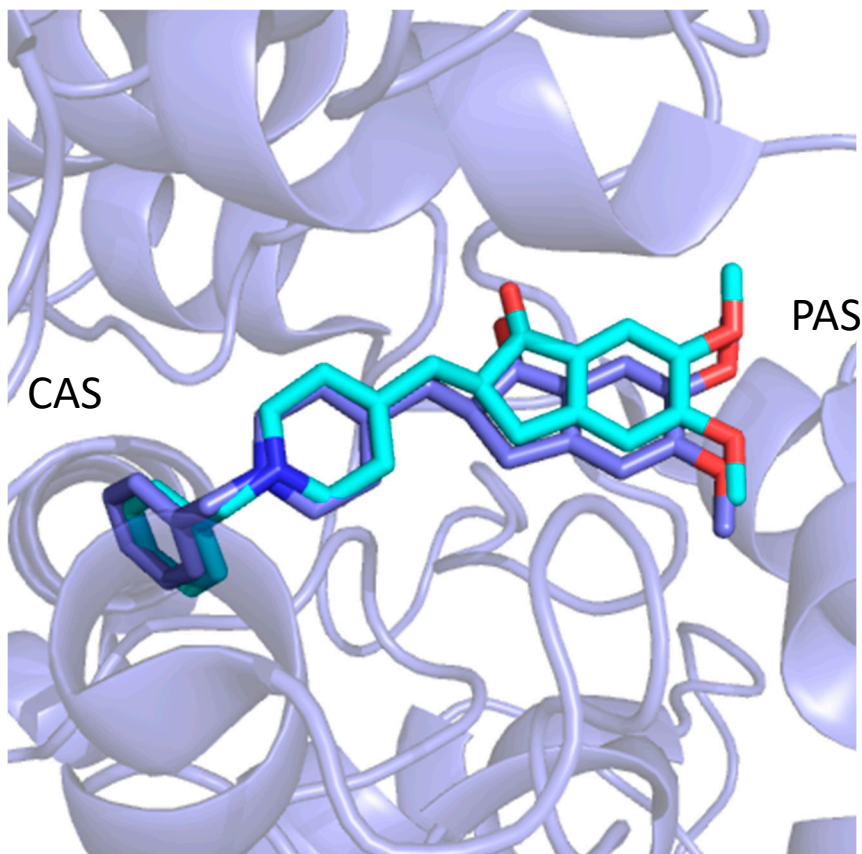

**Figure S2.** Validation of the docking protocol by using donepezil. The co-crystallized ligand was re-docked to confirm the docking protocol of AChE. The co-crystallized ligand (light blue) and the docked ligand (cyan) displayed similar poses. The RMSD values of the re-docking results in AChE is 1.6494 Å. The catalytic anionic site (CAS) and the peripheral anionic site (PAS) of AChE.
